# Supplementary material
Source: publisher site journal article supplement (https://www.dovepress.com/article/271365)
Supplement: Supplementary file 1 [file get_supplementary_file.php]

**
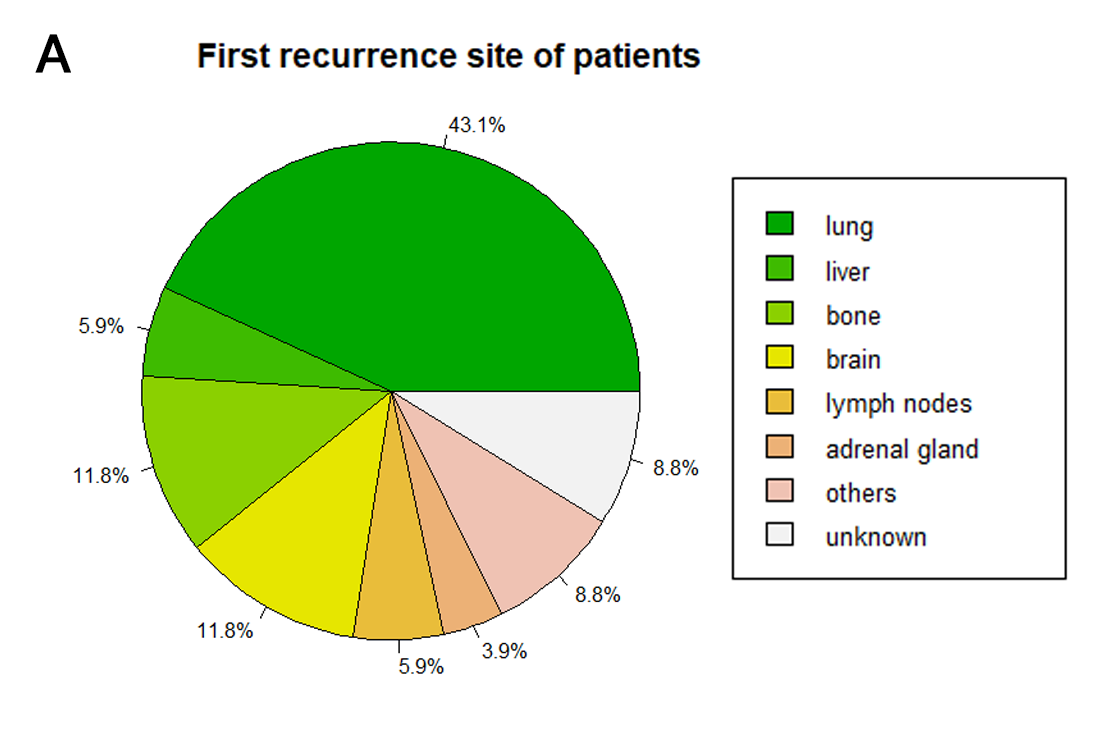
**

**Supplementary Figure 1.** The pie of the first recurrence site of all patients (A)


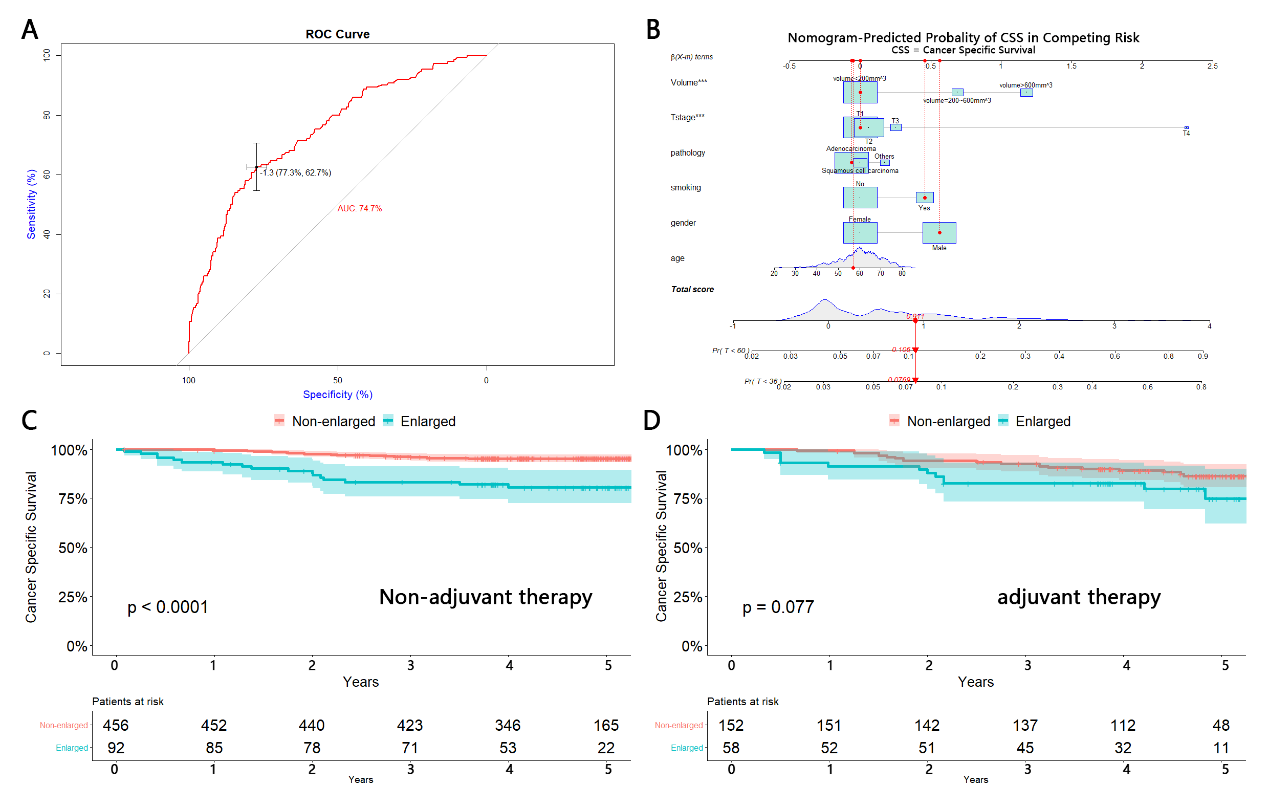


**Supplementary Figure 2.** The ROC curve of logistic regression model on the risk of LN enlargement (A), the nomogram of the nomogram of the competing risk model after multivariate analysis (B), and the cumulative survival of NSCLC LN enlargement patients with adjuvant therapy (C) or not (D). *, p<0.05; **, p<0.01; ***, p<0.001


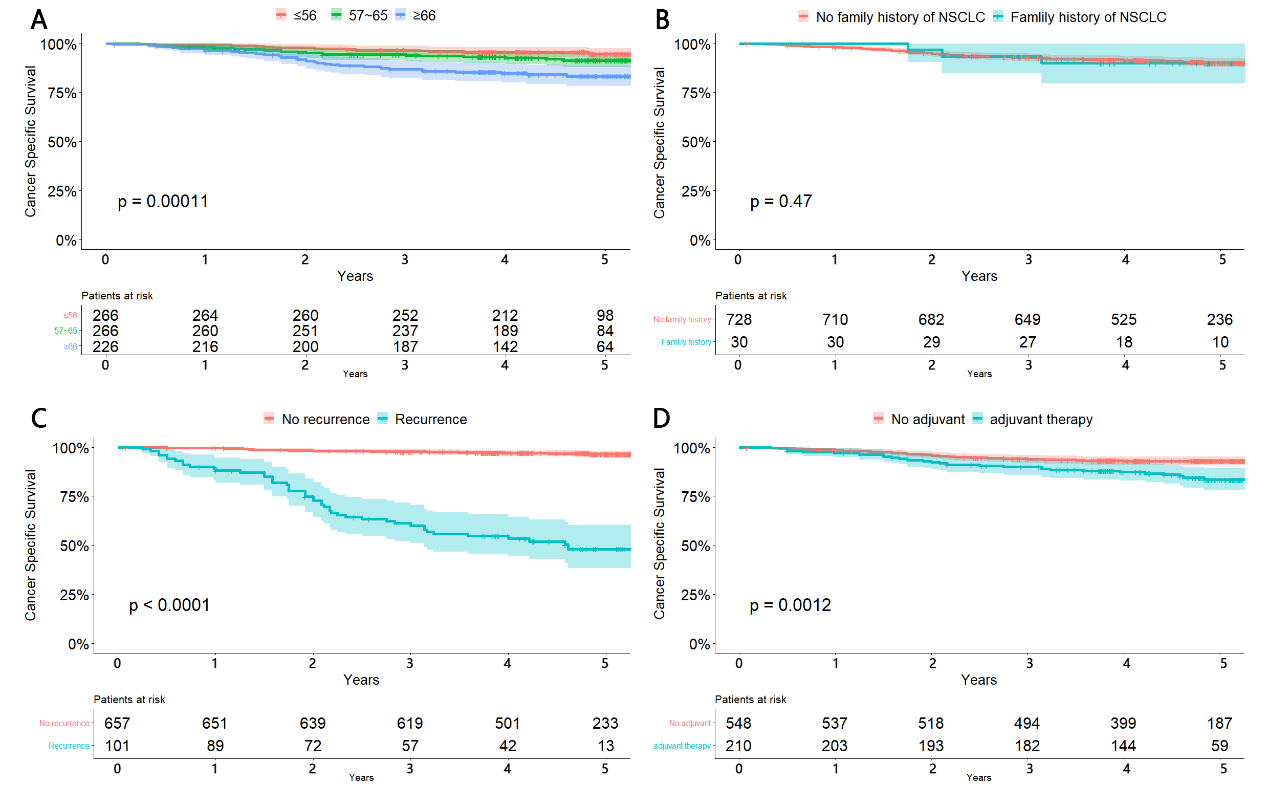


**Supplementary Figure 3.** The cumulative survival of NSCLC patients with other risk factors including age group (A), family history of NSCLC (B), relapse (C) and adjuvant therapy (D).

**Supplement Table 1. Multivariable Analysis of Predictors of LN enlargement in the Overall Cohort**

| **Variable** | **HR** | **95% CI** | **P** |
| --- | --- | --- | --- |
| Age | 1.032 | 1.010~1.054 | 0.004 |
| Sex |  |  |  |
| Female | Reference | — | — |
| Male | 1.503 | 0.932~2.423 | 0.095 |
| Smoking |  |  |  |
| Yes | 1.233 | 0.734~2.071 | 0.428 |
| No | Reference | — | — |
| Pathology |  |  |  |
| Squamous cell carcinoma | Reference | — | 0.003 |
| Adenocarcinoma | 0.391 | 0.227~0.674 | 0.001 |
| Others | 0.399 | 0.163~0.980 | 0.045 |
| T stage |  |  |  |
| T1 | Reference | — | 0.045 |
| T2 | 1.645 | 1.081~2.502 | 0.020 |
| T3 | 2.037 | 0.950~4.369 | 0.068 |
| T4 | 4.588 | 0.565~37.225 | 0.154 |
